# Supplementary material for: The Sterol Transporter Npc2c Controls Intestinal Stem Cell Mitosis and Host–Microbiome Interactions in Drosophila
Source: MDPI journal article supplement (doi:10.3390/metabo13101084), 2023-10-16
Supplement: s1 [file s1]

# **The sterol transporter *Npc2c* controls intestinal stem cell mitosis and host-microbiome interactions in *Drosophila***

## **SUPPLEMENTARY TABLES**

**Table S1:** Key Resources Table

**Table S2:** List of primer sequences

**Table S3:** qPCR amplification program

**Table S4:** 16S colony PCR amplification program

## **SUPPLEMENTARY FIGURES**

**Figure S1.** *Npc2* gene family expression in adult midguts.

**Figure S2.** Progenitor-specific *Npc2c* silencing reduces mitosis effectively, but it does not cause apoptosis.

**Figure S3.** Supplementation of the diet with cholesterol or 20E does not rescue reduced mitosis caused by *Npc2c* silencing.

**Table S1:** Key Resources Table

| REAGENT or RESOURCE                                  | SOURCE                    | IDENTIFIER    |
|------------------------------------------------------|---------------------------|---------------|
| <b>Antibodies</b>                                    |                           |               |
| Rabbit anti-Npc2c                                    | Boster                    | DZ41252       |
| Rabbit anti-phospho Histone H3(Ser10)                | Millipore                 | 06-570        |
| Chicken anti-GFP                                     | Invitrogen                | A10262        |
| Rabbit anti-GFP                                      | Invitrogen                | A6455         |
| Rabbit anti-Cleaved Caspase-3                        | Cell Signaling            | 9661          |
| Mouse anti-Prospero                                  | DSHB                      | MR1A          |
| Mouse anti-Delta                                     | DSHB                      | C594.9B       |
| Alexa Fluor™ 488 donkey anti-rabbit IgG              | Invitrogen                | A21206        |
| Alexa Fluor™ 488 goat anti-chicken IgG               | Invitrogen                | A32931        |
| Alexa Fluor™ 555 goat anti-rat IgG                   | Invitrogen                | A-21434       |
| Alexa Fluor™ 555 donkey anti-mouse IgG               | Invitrogen                | A31570        |
| Alexa Fluor™ 555 donkey anti-rabbit IgG              | Invitrogen                | A31572        |
| Alexa Fluor™ 555 goat anti-rat IgG                   | Invitrogen                | A-21434       |
| Streptavidin, Cy3                                    | Vector Laboratories       | SA-1300       |
| <b>Bacterial Strains</b>                             |                           |               |
| <i>Pseudomonas aeruginosa</i> , PA14                 | Apidianakis & Rahme, 2009 | NA            |
| <b>Chemicals, Peptides, and Recombinant Proteins</b> |                           |               |
| <i>Drosophila</i> Agar Type II                       | Apex                      | 66-103        |
| Cornmeal                                             | Local market              | NA            |
| Inactivated dried yeast                              | Local market              | NA            |
| Sucrose                                              | Local market              | NA            |
| Tegosept                                             | Apex                      | 20-258        |
| Propionic acid                                       | Scharlau                  | AC18941000    |
| Acetic acid glacial, ACS reagent, ≥99.7%             | Sigma                     | 695092        |
| Luria Broth                                          | Condalab                  | 1231.00       |
| Luria Broth agar                                     | Invitrogen                | 22700-025     |
| Brain Heart Infusion (BHI) broth                     | Millipore                 | 110493        |
| Hemin                                                | Sigma                     | 51280         |
| Vitamin K <sub>1</sub>                               | Sigma                     | V3501         |
| QIAzol Lysis Reagent                                 | QIAGEN                    | 79306         |
| Bovine Serum Albumin                                 | Sigma                     | A7888         |
| Triton™ X-100                                        | Sigma                     | T8787         |
| Filipin III from Streptomyces filipinensis           | Sigma                     | F4767         |
| RH5849                                               | DrEhrenstorfer            | DRE-C16813000 |
| Cholesterol                                          | Sigma                     | C8667-500MG   |
| 20 Hydroxyecdysone                                   | Sigma                     | H5142         |
| DAPI                                                 | Sigma                     | D9542-10mg    |
| Vectashield Antifade Mounting Medium                 | Vector                    | H-1000        |
| Bromophenol blue                                     | Sigma                     | 114391        |
| KAPA SYBR Fast Master Mix (2x) Universal             | KAPA Biosystems           | KK4602        |
| UltraPure Distilled Water DNase/RNase Free           | Invitrogen                | 10977-035     |
| Ethanol absolute                                     | Scharlau                  | ET00072500    |
| Methanol                                             | Honeywell                 | 34860         |
| 2-Propanol                                           | Honeywell                 | 24137         |
| Chloroform                                           | Millipore                 | 1.02445.2500  |
| DMSO                                                 | Sigma                     | D2650         |
| Agarose                                              | Cleaver Scientific        | 9012-36-6     |
| Ethidium bromide solution                            | Sigma                     | E-1385        |
| <b>Critical Commercial Assays</b>                    |                           |               |
| RQ1 reagent kit                                      | Promega                   | M6101         |
| PrimeScript RT Master Mix                            | Takara                    | RR036A        |

|                                                                                        |                                                                                                         |                                                                                                                       |
|----------------------------------------------------------------------------------------|---------------------------------------------------------------------------------------------------------|-----------------------------------------------------------------------------------------------------------------------|
| KAPA HiFi HotStart Ready Mix PCR Kit                                                   | Roche                                                                                                   | 07958889001                                                                                                           |
| NucleoSpin Gel and PCR Clean up                                                        | Macherey-Nagel                                                                                          | 740609.50                                                                                                             |
| <b>Experimental Models: <i>Drosophila melanogaster</i> Strains</b>                     |                                                                                                         |                                                                                                                       |
| <i>w</i> <sup>1118</sup>                                                               | BDSC                                                                                                    | 6326                                                                                                                  |
| <i>w; esg-Gal4 UAS-GFP tub-Gal80<sup>ts</sup> (esg<sup>ts</sup>-Gal4)</i>              | Micchelli & Perrimon, 2006                                                                              | NA                                                                                                                    |
| <i>w; esg-Gal4 UAS-GFP tub-Gal80<sup>ts</sup>; Su(H)-Gal80 (ISC<sup>ts</sup>-Gal4)</i> | Zheng & Hou, 2015                                                                                       | NA                                                                                                                    |
| <i>w; Su(H)-Gal4 UAS-CD8GFP tub-Gal80<sup>ts20</sup>/CyO (SuH<sup>ts</sup>-Gal4)</i>   | Tamamouna et al, 2020                                                                                   | NA                                                                                                                    |
| <i>w tub-Gal80<sup>ts</sup>/FM7; Myo1A-Gal4 UAS-EGFP/CyO (Myo1A<sup>ts</sup>-Gal4)</i> | Apidianakis et al, 2009                                                                                 | NA                                                                                                                    |
| <i>w hsFLP tub-Gal4 UAS-nls-GFP/FM7; FRT82B tub-Gal80/TM6B</i>                         | Pitsouli & Delidakis, 2005                                                                              | NA                                                                                                                    |
| <i>w; FRT82B arm-lacZ/TM6B</i>                                                         | BDSC                                                                                                    | BDSC-7369                                                                                                             |
| <i>w; UAS-Npc2c<sup>RNAi1</sup>/CyO; FRT82B arm-lacZ/TM6C</i>                          | This study                                                                                              | NA                                                                                                                    |
| <i>w; esg-Gal4 UAS-eGFP tub-Gal80<sup>ts</sup>/CyO; UAS-Ras1<sup>Q13</sup>/TM6C</i>    | Neophytou & Pitsouli, 2021                                                                              | NA                                                                                                                    |
| <i>w; UAS-Npc2a<sup>RNAi</sup> (KK108573)</i>                                          | VDRC                                                                                                    | v106771                                                                                                               |
| <i>w; UAS-Npc2b<sup>RNAi</sup> (KK103974)</i>                                          | VDRC                                                                                                    | v101233                                                                                                               |
| <i>w; UAS-Npc2c<sup>RNAi1</sup> (KK103904)</i>                                         | VDRC                                                                                                    | v101583                                                                                                               |
| <i>w; UAS-Npc2c<sup>RNAi2</sup> (GD6798)</i>                                           | VDRC                                                                                                    | v31139                                                                                                                |
| <i>w; UAS-Npc2d<sup>RNAi</sup> (GD5679)</i>                                            | VDRC                                                                                                    | v31095                                                                                                                |
| <i>w; UAS-Npc2e<sup>RNAi</sup> (KK104354)</i>                                          | VDRC                                                                                                    | v100445                                                                                                               |
| <i>w; UAS-Npc2f<sup>RNAi</sup> (KK111008)</i>                                          | VDRC                                                                                                    | v102172                                                                                                               |
| <b>Oligonucleotides</b>                                                                |                                                                                                         |                                                                                                                       |
| See Table S2 for primer sequences                                                      | Integrated DNA Technologies (IDT)                                                                       | NA                                                                                                                    |
| <b>Deposited Data</b>                                                                  |                                                                                                         |                                                                                                                       |
| Metagenomic sequencing data                                                            | <a href="https://www.ncbi.nlm.nih.gov/sra/PRJNA804129">https://www.ncbi.nlm.nih.gov/sra/PRJNA804129</a> | PRJNA804129                                                                                                           |
| <b>Software and Algorithms</b>                                                         |                                                                                                         |                                                                                                                       |
| ImageJ                                                                                 | NIH                                                                                                     | <a href="https://imagej.nih.gov/ij/">https://imagej.nih.gov/ij/</a>                                                   |
| Prism 9                                                                                | GraphPad                                                                                                | <a href="https://www.graphpad.com/scientific-software/prism/">https://www.graphpad.com/scientific-software/prism/</a> |
| Photoshop 2023                                                                         | Adobe                                                                                                   | <a href="https://www.adobe.com/cy_en/products/photoshop.html">https://www.adobe.com/cy_en/products/photoshop.html</a> |
| BLAST                                                                                  | NCBI                                                                                                    | <a href="https://blast.ncbi.nlm.nih.gov/Blast.cgi">https://blast.ncbi.nlm.nih.gov/Blast.cgi</a>                       |
| Microsoft Office 2023                                                                  | Microsoft                                                                                               | <a href="https://www.office.com/">https://www.office.com/</a>                                                         |
| Mann-Whitney U Test Calculator                                                         | Social Science Statistics                                                                               | <a href="http://www.socscistatistics.com">www.socscistatistics.com</a>                                                |
| Log-Rank Test                                                                          | MedCalc statistical software                                                                            | <a href="http://www.medcalc.org">www.medcalc.org</a>                                                                  |
| FlyAtlas2                                                                              | Leader et al, 2017                                                                                      | <a href="https://motif.mvls.gla.ac.uk/FlyAtlas2">https://motif.mvls.gla.ac.uk/FlyAtlas2</a>                           |

**Table S2: List of primer sequences**

| Primers used for 16S rRNA amplification          |                |                           |                            |
|--------------------------------------------------|----------------|---------------------------|----------------------------|
| Name                                             |                | Sequence                  |                            |
| 27F                                              |                | AGAGTTTGATCCTGGCTCAG      |                            |
| 1492R                                            |                | GGTTACCTTGTTACGACTT       |                            |
| Primers used in RT-qPCR experiments              |                |                           |                            |
| Gene Name                                        | Gene symbol    | Forward Primer            | Reverse Primer             |
| Alpha tubulin                                    | $\alpha$ -tub  | GCTGTTCCACCCCGAGCAGCTGATC | GGCGAACTCCAGCTTGGACTTCTTGC |
| <i>Attacin A</i>                                 | <i>AttA</i>    | CACAATGTGGTGGGTCAAGG      | GGCACCATGACCAGCATT         |
| <i>Broad</i>                                     | <i>Br</i>      | TAACCTCGGCGTTCGAGAATC     | TTTGCAGGGTGTGCTCTTGA       |
| <i>Cyclin A</i>                                  | <i>CycA</i>    | TCTGGAATATTCCGGGAGAG      | AGCGCATATTGTGGCTAATGT      |
| <i>Cyclin B</i>                                  | <i>CycB</i>    | GATGCGGCACAGAAAGACTC      | TTCTTCCAGTGGCTGTCCA        |
| <i>Cyclin E</i>                                  | <i>CycE</i>    | ACAAATTTGGCCTGGGACTA      | GGCCATAAGCACTTCGTCA        |
| <i>Death-associated inhibitor of apoptosis 1</i> | <i>Diap1</i>   | CCCCAGTATCCCGAATACGC      | TCTGTTTCAGGTTCTCTCGGC      |
| <i>decapentaplegic</i>                           | <i>dpp</i>     | GTATCTGTGTGCGCTGCTG       | CCTAAGCATACTCTCTTTTCCTC    |
| <i>Delta</i>                                     | <i>Dl</i>      | GCGACAAGCCCAATCAAT        | GGTTCCAGAACGCACTCG         |
| <i>Diptericin A</i>                              | <i>Dipt</i>    | GGCTTATCCGATGCCGACG       | TCTGTAGGTGTAGGTGCTTCCC     |
| <i>Drosomycin</i>                                | <i>Drs</i>     | GACTTGTTCCGCTCTTCG        | CTTGACACAGACGACAG          |
| <i>Dual oxidase</i>                              | <i>Duox</i>    | CACGCGCAGCAGGATGTAAGGTTT  | GCTGCACGCCAACCAAGAGACT     |
| <i>Ecdysone-induced protein 75B</i>              | <i>Eip75B</i>  | ATGCAACAGAGCACCCAGAAT     | CATGGAGTAGGAGGGGCAATC      |
| <i>eiger</i>                                     | <i>egr</i>     | AGCTGATCCCCCTGGTTTTG      | GCCAGATCGTTAGTGCGAGA       |
| <i>glass bottom boat</i>                         | <i>gbb</i>     | GAGTGGCTGGTCAAGTCGAA      | GAAGCCGATCATGAAGGGCT       |
| <i>hedgehog</i>                                  | <i>hh</i>      | CAAGGAGCAGTTGCACAGTT      | TGTAGAGCGCATTGGCATAAC      |
| <i>Insulin-like peptide 3</i>                    | <i>Dilp3</i>   | CCGTTCCCTGCTGGAAAGAC      | AGGCAACACTCGTCGAAGAC       |
| <i>Insulin-like peptide 7</i>                    | <i>Dilp7</i>   | CCTGGCTGCACGTGAACTAT      | TGGATGGACAATACTCGGCG       |
| <i>Keren</i>                                     | <i>Krn</i>     | CCGCTTTAATCGGCGCTTAC      | GGTCTCGGCGTTGTGGATAT       |
| <i>Mitf</i>                                      | <i>Mitf</i>    | AGTATCGGAGTAGATGTGCCAC    | CGCTGAGATATTGCCTCACTTG     |
| <i>NADPH oxidase</i>                             | <i>Nox</i>     | ACCCATCAACCAGCAGTCAG      | GTGCATCCAAATCGAGTACGG      |
| <i>Niemann-Pick type C-2c</i>                    | <i>Npc2c</i>   | TCCCTGTGCCTAGTGCTTTCT     | GGCTGAGGATAGTTGCTGTGCG     |
| <i>puckered</i>                                  | <i>puc</i>     | GCCACATCAGAACATCAAGC      | CCGTTTTCCGTGCATCTT         |
| <i>Ribosomal protein L32</i>                     | <i>RpL32</i>   | CGGATCGATATGCTAAGCTGT     | CGACGCACTCTGTTGTGCG        |
| <i>short gastrulation</i>                        | <i>sog</i>     | GAGCGAACCAATCACTCACTC     | CAAGTTCTCATTGCTGCCAC       |
| <i>spatzle</i>                                   | <i>spz</i>     | GTGATTCTGGAAAATGGGATTC    | TCTGTGGTGGGTGAAACTTCT      |
| <i>spitz</i>                                     | <i>spi</i>     | TGCGGTGAAGATAGCCGATC      | TTCGCATCGCTGTCCCATAA       |
| <i>Suppressor of cytokine signaling at 36E</i>   | <i>Socs36E</i> | ATGGGTCATCACCTTAGCAAGT    | TCCAGGCTGATCGTCTCTACT      |
| <i>unpaired 1</i>                                | <i>upd1</i>    | TGCAGTTGCCGTTCTAGTCA      | GCGTGGCGAATAATACTTTCC      |
| <i>unpaired 2</i>                                | <i>upd2</i>    | CGGAACATCACGATGAGCGAAT    | TCGGCAGGAACCTGTACTCG       |
| <i>unpaired 3</i>                                | <i>upd3</i>    | GCAAGAAACGCCAAAGGA        | CTTGTCCGCATTGGTGGT         |
| <i>vein</i>                                      | <i>vn</i>      | TCACACATTTAGTGGTGAAGC     | CGTGACCTCTGCGTTCTGT        |
| <i>wingless</i>                                  | <i>wg</i>      | CAGGGACGCAAGCATAATAGA     | CTGCCGCAGGTTCTTCTC         |

**Table S3: qPCR amplification program**

| Step                 | Temperature (°C) | Time (seconds) | Repeats of Cycles |
|----------------------|------------------|----------------|-------------------|
| Initial Denaturation | 95               | 30             | 1                 |
| Denaturation         | 95               | 10             |                   |
| Annealing            | 60               | 30             | 40                |
| Extension            | 65               | 30             |                   |
| Final extension      | 65               | 60             | 1                 |

**Table S4: 16S colony PCR amplification program**

| Step                 | Temperature (°C) | Time   | Repeats of Cycles |
|----------------------|------------------|--------|-------------------|
| Initial Denaturation | 95               | 5 min  | 1                 |
| Denaturation         | 95               | 20 sec |                   |
| Annealing            | 60-75            | 30 sec | 25                |
| Extension            | 72               | 90 sec |                   |
| Final extension      | 72               | 5 min  | 1                 |

## REFERENCES

- Apidianakis, Y.; Pitsouli, C.; Perrimon, N.; Rahme, L. Synergy between bacterial infection and genetic predisposition in intestinal dysplasia. *Proceedings of the National Academy of Sciences* **2009**, *106*, 20883-20888, doi:10.1073/pnas.0911797106.
- Apidianakis, Y.; Pitsouli, C.; Perrimon, N.; Rahme, L. Synergy between bacterial infection and genetic predisposition in intestinal dysplasia. *Proceedings of the National Academy of Sciences* **2009**, *106*, 20883-20888, doi:10.1073/pnas.0911797106.
- Leader, D.P.; Krause, S.A.; Pandit, A.; Davies, S.A.; Dow, J.A T. FlyAtlas 2: a new version of the *Drosophila melanogaster* expression atlas with RNA-Seq, miRNA-Seq and sex-specific data. *Nucleic Acids Research* **2017**, *46*, D809-D815, doi:10.1093/nar/gkx976.
- Micchelli, C.A.; Perrimon, N. Evidence that stem cells reside in the adult *Drosophila* midgut epithelium. *Nature* **2006**, *439*, 475-479, doi:10.1038/nature04371.
- Neophytou, C.; Pitsouli, C. Biotin controls intestinal stem cell mitosis and host-microbiome interactions. *Cell Rep* **2022**, *38*, 110505, doi:10.1016/j.celrep.2022.110505.
- Pitsouli, C.; Delidakis, C. The interplay between DSL proteins and ubiquitin ligases in Notch signaling. *Development* **2005**, *132*, 4041-4050, doi:10.1242/dev.01979.
- Tamamouna, V.; Panagi, M.; Theophanous, A.; Demosthenous, M.; Michail, M.; Papadopoulou, M.; Teloni, S.; Pitsouli, C.; Apidianakis, Y. Evidence of two types of balance between stem cell mitosis and enterocyte nucleus growth in the *Drosophila* midgut. *Development* **2020**, *147*, dev189472, doi:10.1242/dev.189472.
- Zeng, X.; Hou, S.X. Enteroendocrine cells are generated from stem cells through a distinct progenitor in the adult *Drosophila* posterior midgut. *Development* **2015**, *142*, 644-653, doi:10.1242/dev.113357.

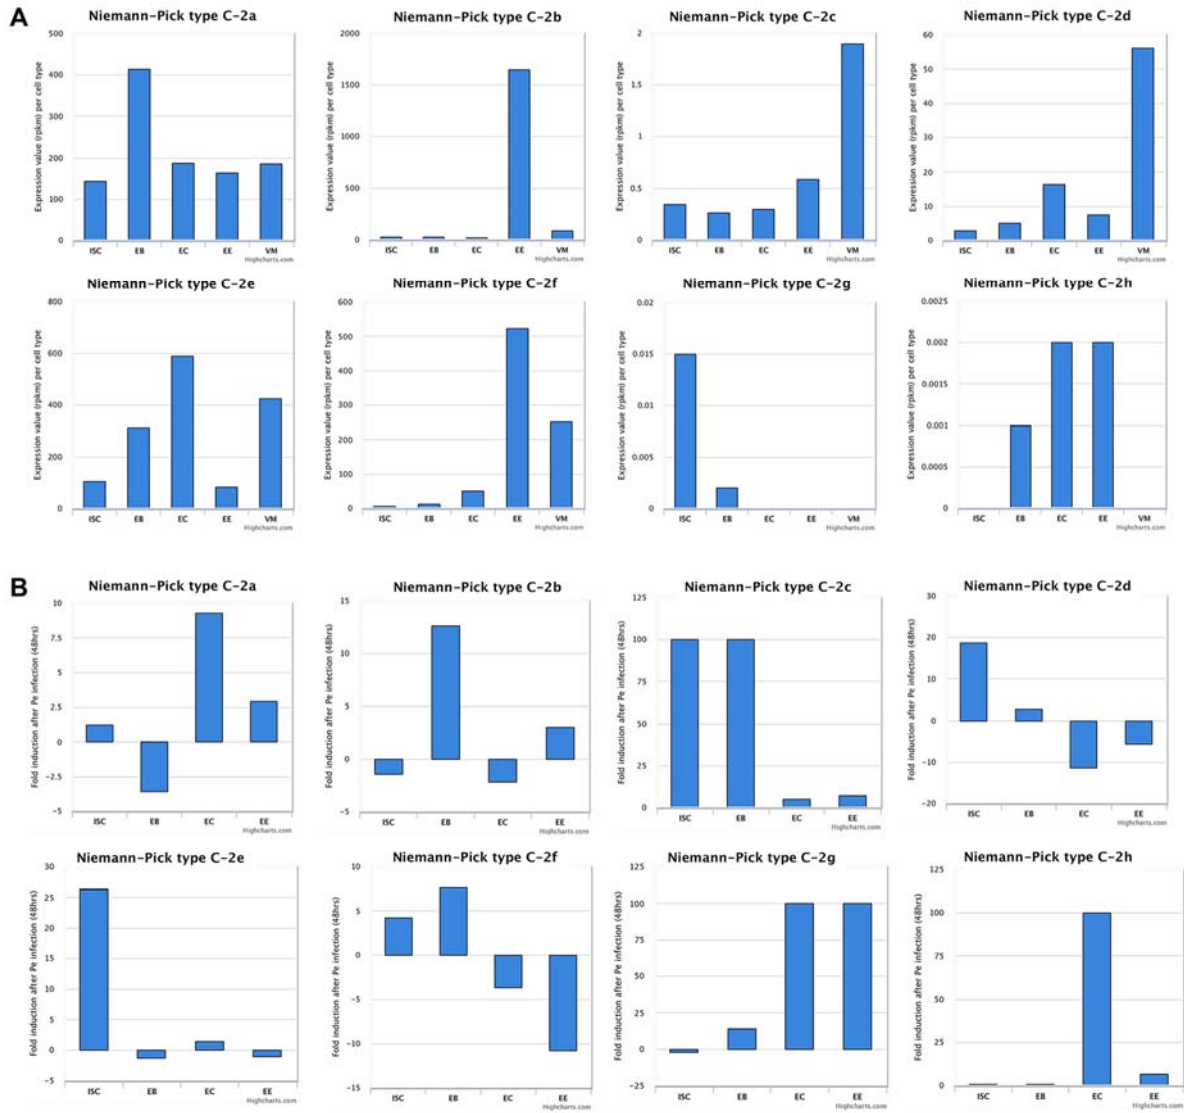

**Figure S1. *Npc2* gene family expression in adult midguts. (A) *Npc2a-h* transcript expression in different adult midgut cell types. (B) *Npc2a-h* transcript expression in different adult midgut cell types upon *P. entomophila* infection. Data retrieved from FlygutSeq (<http://flygutseq.buchonlab.com/>).**

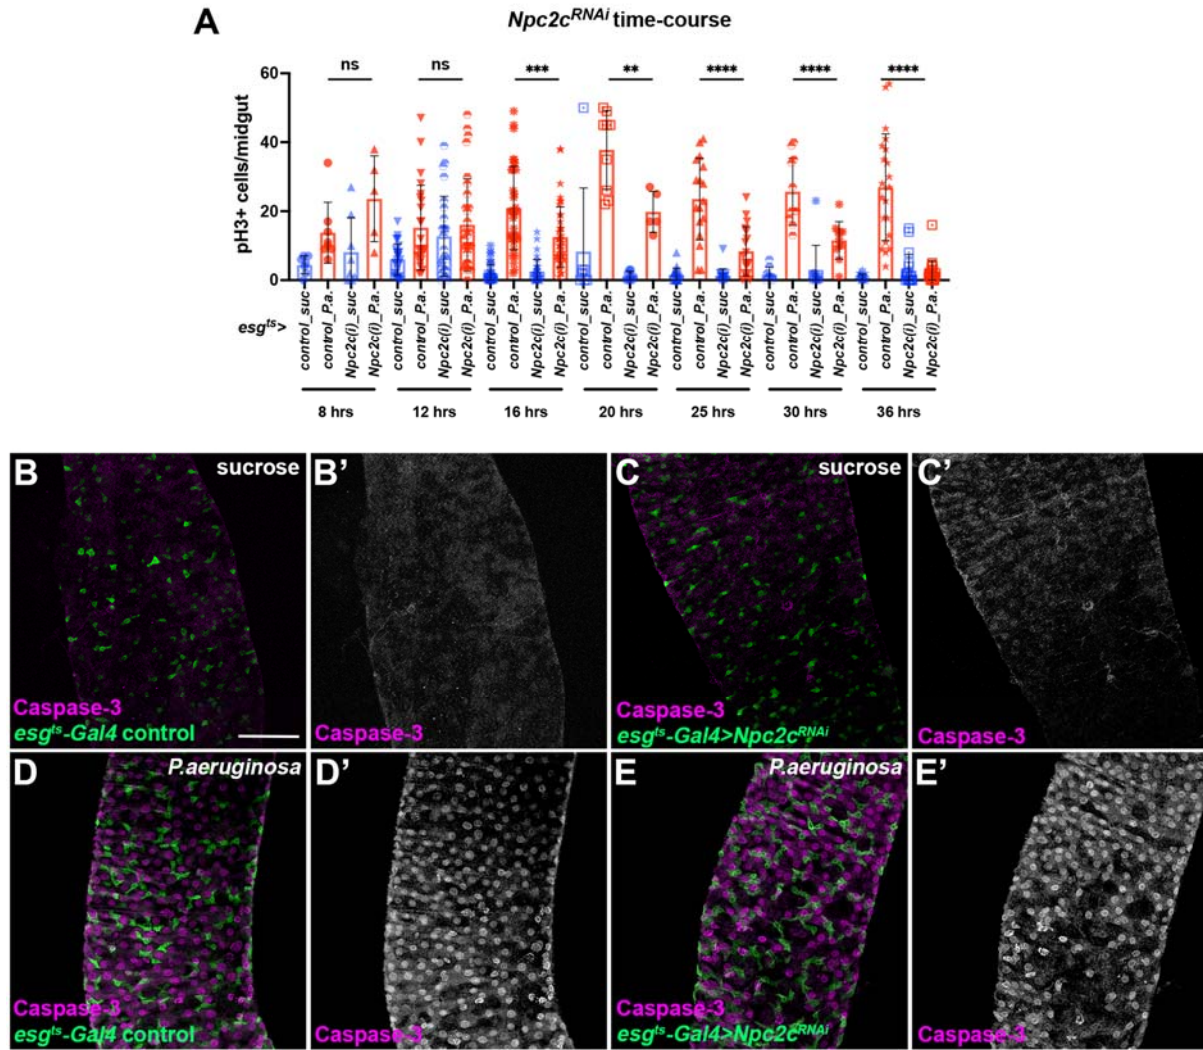

**Figure S2. Progenitor-specific *Npc2c* silencing reduces mitosis effectively, but it does not cause apoptosis.** (A) Quantification of the mitotic index (pH3-positive cells) in *esg*<sup>ts</sup>-*Gal4* control and *esg*<sup>ts</sup>-*Gal4*>*Npc2c*<sup>RNAi1</sup> adult midguts during a time-course experiment of 8, 12, 18, 20, 25, 30, and 36 hrs post-transgene induction in uninfected (blue bars) and *P.a.*-infected (red bars) flies. Mitosis is gradually reduced and by 36 hrs it is eliminated in both uninfected and *P.a.*-infected midguts. (B-E) *esg*<sup>ts</sup>-*Gal4* control (B,D) and *esg*<sup>ts</sup>-*Gal4*>*Npc2c*<sup>RNAi1</sup> (C,E) adult posterior midguts without (B-C) and with *P.a.* infection (D-E) stained for anti-cleaved Caspase-3 (magenta). GFP (green) labels the intestinal progenitors. The Caspase-3 channel is shown separately in grey in B'-E'. Although infection induces apoptosis, this is restricted to mature intestinal cells. Scale bars 75  $\mu$ m. Experiments were repeated at least twice. Statistical significance in A was tested with the Student's t-test: ns, not significant, \* 0.01<p $\le$ 0.05, \*\* 0.001<p $\le$ 0.01, \*\*\* 0.0001<p $\le$ 0.001, \*\*\*\* p $\le$ 0.0001.

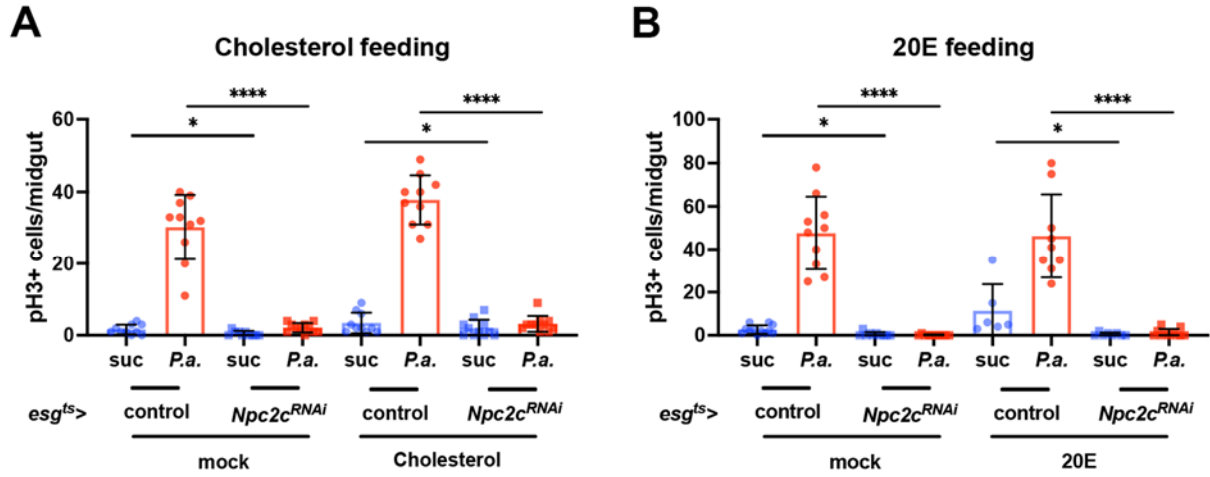

**Figure S3. Supplementation of the diet with cholesterol or 20E does not rescue reduced mitosis caused by *Npc2c* silencing.** (A) Quantification of the mitotic index (pH3-positive cells) in *esg<sup>ts</sup>-Gal4* control and *esg<sup>ts</sup>-Gal4>Npc2c<sup>RNAi1</sup>* uninfected and *P.a.*-infected adult midguts upon cholesterol supplementation. (B) Quantification of the mitotic index (pH3-positive cells) in *esg<sup>ts</sup>-Gal4* control and *esg<sup>ts</sup>-Gal4>Npc2c<sup>RNAi1</sup>* uninfected and *P.a.*-infected adult midguts upon 20E supplementation. Error bars correspond to the standard deviation. Experiments were repeated at least twice. Statistical significance in E was tested with the Student's t-test: ns, not significant, \* 0.01 < p ≤ 0.05, \*\* 0.001 < p ≤ 0.01, \*\*\* 0.0001 < p ≤ 0.001, \*\*\*\* p ≤ 0.0001.
